# Supplementary material for: Island shape and electronic structure in diindenoperylene thin films deposited on Au(110) single crystals
Source: Royal Society of Chemistry journal article supplement (doi:10.1039/c6cp00259e), 2016-01-01
Supplement: c6cp00259e1.pdf [file c6cp00259e1.pdf]

# Island shape and electronic structure in diindenoperylene thin films deposited on Au(110) single crystals

*Francesca Ciccullo,<sup>a</sup> Sabine-A. Savu,<sup>a</sup> Mathias Glaser,<sup>a</sup> Maria Luiza M. Rocco,<sup>b</sup> Thomas  
Chassé,<sup>a</sup> M. Benedetta Casu<sup>a\*</sup>*

<sup>a</sup>Institute of Physical and Theoretical Chemistry, University of Tübingen, Auf der  
Morgenstelle 18, 72076 Tübingen, Germany

<sup>b</sup>Institute of Chemistry, Federal University of Rio de Janeiro, Rio de Janeiro, 21941-909,  
Brazil

## **Corresponding Author**

\*E-mail: benedetta.casu@uni-tuebingen.de, Tel. +49 7071 29 76252, Fax: +49 7071 29 5490  
(M.B.C.).

This Electronic Supplementary Information contains:

- 1) A LEED pattern of the clean substrate.
- 2) Additional thickness dependent RPES investigations.

1)

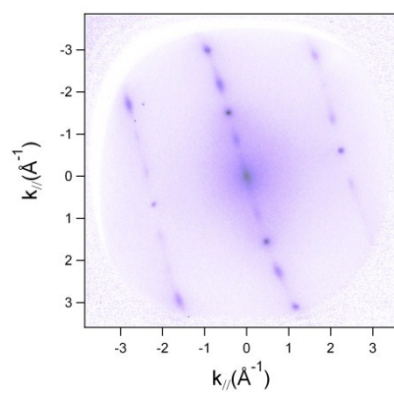

Figure S1. A LEED pattern with the expected  $2 \times 1$  Au(110) reconstruction obtained by using the SPELEEM at ELETTRA.

2)

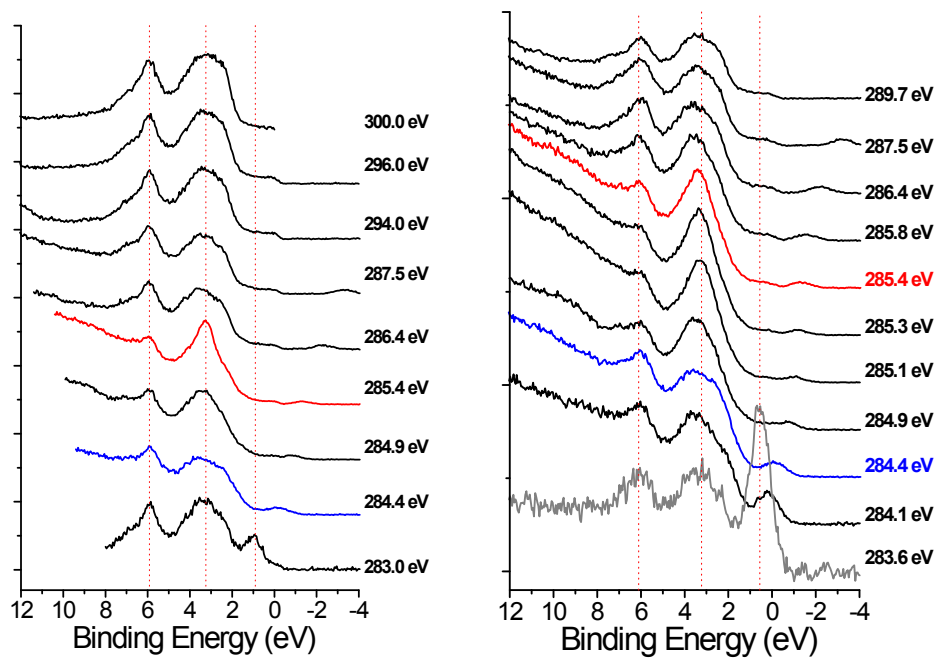

a)

b)

Figure S3. RPES spectra measured at different photon energies, as indicated, for the a) 24 Å and b) 48 Å nominally thicker films, as in Figure 2. The trend is consistent with Figure 4.
